# Supplementary material
Source: PubMed Central journal article supplement (PMC3158141)
Supplement: 1108440108_pnas.201108440SI.pdf [file 1108440108_pnas.201108440SI.pdf]

# Supporting Information

Linnemann et al. 10.1073/pnas.1108440108

## SI Materials and Methods

**ELISA.** Control siRNA- and GATA binding protein 2 (*GATA-2*) siRNA-transfected cells were treated with 10 ng/mL recombinant human TNF- $\alpha$  (Miltenyi Biotec) or an equal volume of

vehicle (1% BSA in water) for 6 h before collection 24 h post-transfection. Supernatants were collected and analyzed for IL-8 by ELISA (Quantikine kit; R&D Systems). Gene expression was analyzed in each sample to validate the *GATA-2* knockdown.

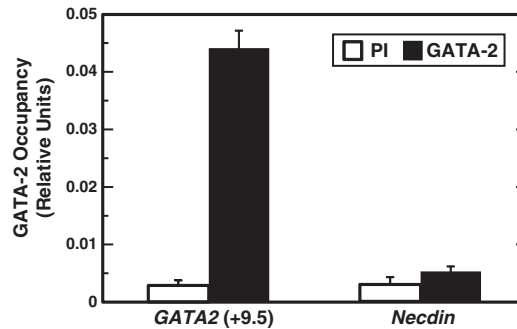

**Fig. S1.** Quantitative ChIP validation of samples used for ChIP sequencing (ChIP-seq). Quantitative ChIP analysis of GATA-2 occupancy at the *GATA2* +9.5-kb intronic enhancer. The *Necdin* promoter was analyzed as a negative control. Data shown are mean  $\pm$  SE;  $n = 3$ . PI, preimmune control.

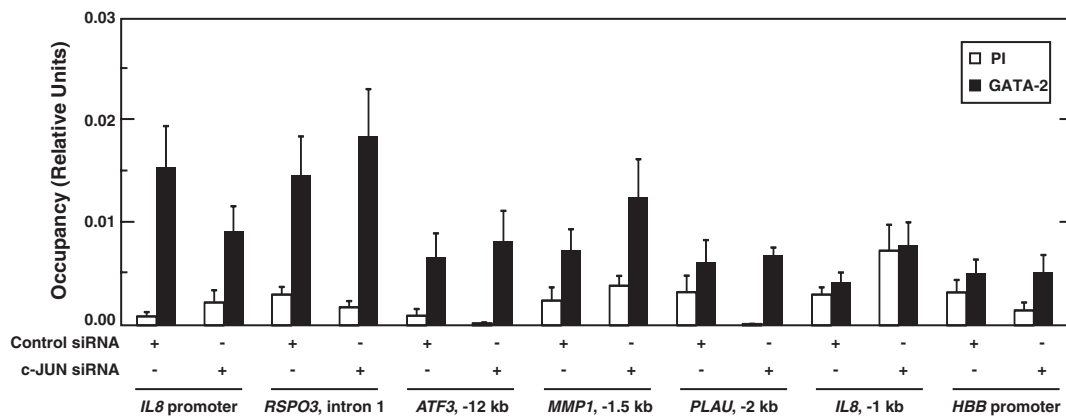

**Fig. S2.** The jun proto-oncogene (*c-JUN*) knockdown does not affect GATA-2 chromatin occupancy. Quantitative ChIP at GATA-2/AP-1-regulated genes [*IL-8*, *RSPO3*, activating transcription factor 3 (*ATF3*), *MMP1*, and *PLAU*] and negative controls [human  $\beta$ -globin (*HBB*) promoter and a site 1 kb upstream of the *IL-8* promoter]. Data shown are mean  $\pm$  SE;  $n = 5$ . PI, preimmune.



## **Dataset S1. Genomic locations of GATA-2 CHIP-seq peaks**

### [Dataset S1](#)

The 15,529 GATA-2-occupied peaks were classified relative to the nearest transcription start site: 5d, regions 10–100 kb upstream of a reference sequence (RefSeq) gene; 5p2, regions 2–10 kb upstream of a RefSeq gene; 5p1, regions <2 kb upstream of a RefSeq gene; gene, any exon or intron of a RefSeq gene; 3p1, regions <2 kb downstream of the last exon of a RefSeq gene; 3p2, regions 2–10 kb downstream of the last exon of a RefSeq gene; 3d, regions between 10–100 kb downstream of the last exon of a RefSeq gene; gd, gene desert (includes regions >100 kb from a RefSeq gene).

## **Dataset S2. GATA-2 occupancy of genes encoding ETS/ETS-variant transcription factors**

### [Dataset S2](#)

The ETS and ETS-variant transcription factors were organized with respect to subfamily. GATA-2 peaks associated with each gene locus are indicated.

## **Dataset S3. Locations and peak heights of genomic loci occupied by both GATA-2 and c-JUN**

### [Dataset S3](#)

## **Dataset S4. Locations and peak heights of genomic loci occupied by both GATA-2 and c-FOS**

### [Dataset S4](#)

## **Dataset S5. PCR primer sequences**

### [Dataset S5](#)
